# Supplementary material
Source: publisher figshare collection journal article supplement (https://brill.figshare.com/articles/dataset/_/5255479)
Supplement: Supplementary file 1 [file 8987641]

# Nest-site selection and the factors influencing hatching success and offspring phenotype in a nocturnal skink

David G. Chapple<sup>1,2</sup>, Susan N. Keall<sup>2</sup>, Charles H. Daugherty<sup>2</sup>, Kelly M. Hare<sup>2,3</sup>

<sup>1</sup> School of Biological Sciences, Monash University, Clayton, Victoria 3800, Australia

<sup>2</sup> School of Biological Sciences, Victoria University of Wellington, PO Box 600, Wellington 6140,  
New Zealand

<sup>3</sup> The Open Polytechnic of New Zealand, Private Bag 31914, Lower Hutt 5040, New Zealand

## **Supplementary Figures**

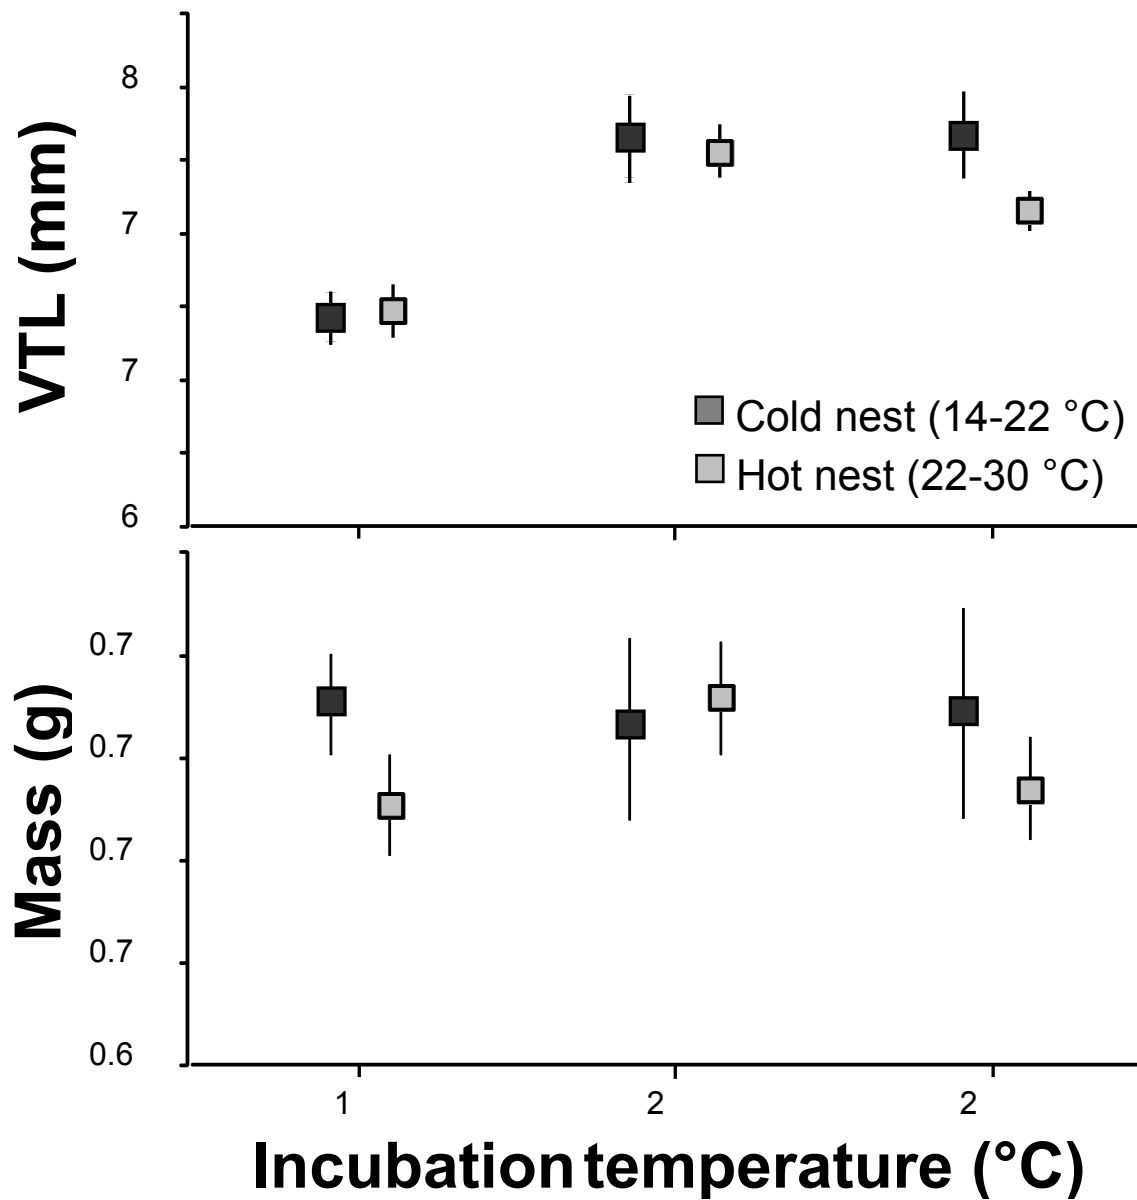

**Figure S1.** Size ( $\pm 1$  SE) of *Oligosoma suteri* hatchlings from eggs laid in hot or cold nest sites that later hatched from one of three incubation temperatures. (Top) vent-tail length (VTL). (Bottom) mass (g). Sample sizes are presented in table 1 within main manuscript.

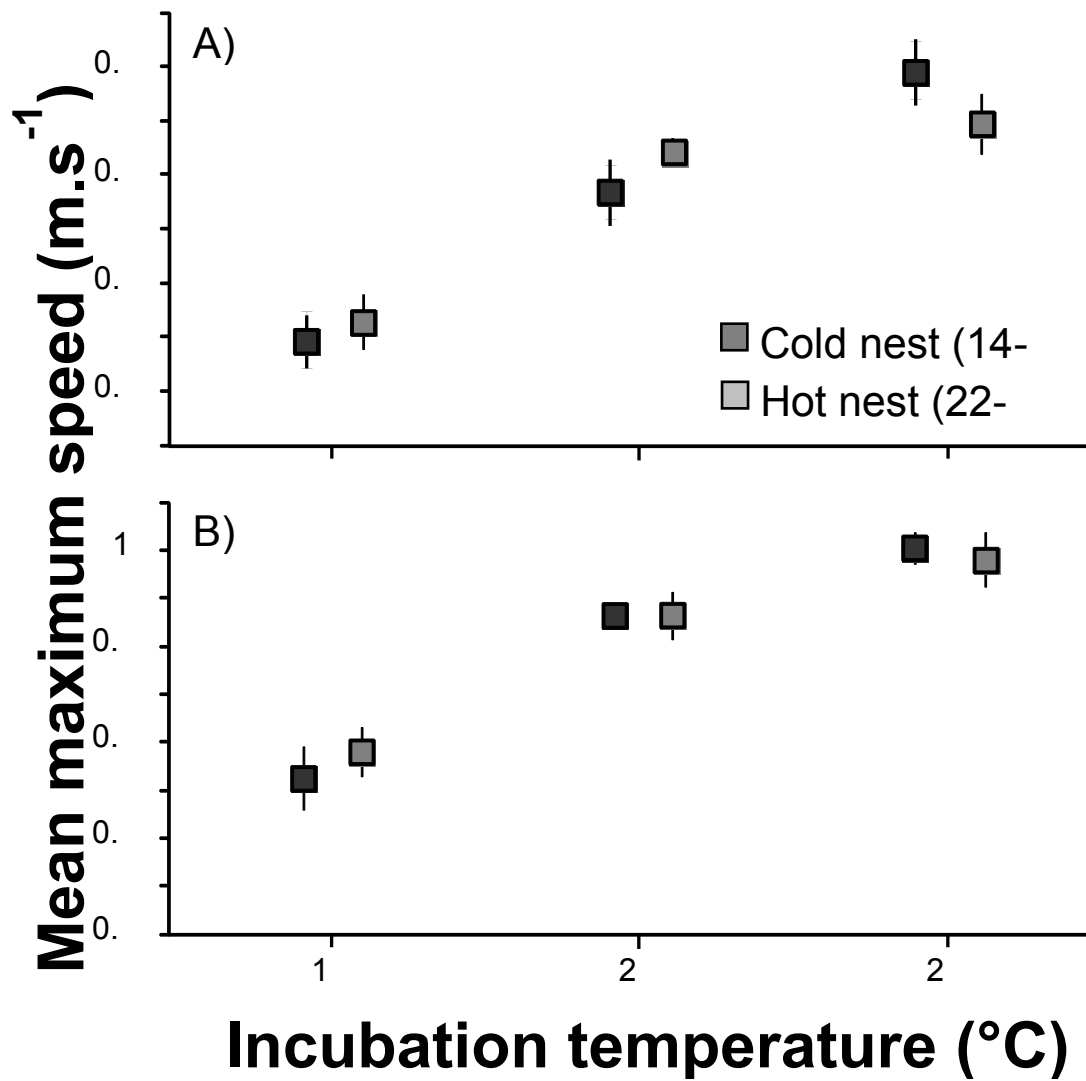

**Figure S2.** Mean maximum sprint speed (m.s<sup>-1</sup> ± 1 SE) of *Oligosoma suteri* at 1 month of age from eggs laid in hot or cold nest sites and later hatched from three incubation temperatures. (A) speed of juveniles measured at ambient temperature of 18 °C. (B) speed of juveniles measured at ambient temperature of 22 °C. Sample sizes are presented in table 1 in main manuscript.
